# Supplementary material for: Pharmacological blockade of the mast cell MRGPRX2 receptor supports investigation of its relevance in skin disorders
Source: Frontiers journal article supplement (doi:10.3389/fimmu.2024.1433982), 2024-10-18
Supplement: Table_2.pdf [file Table_2.pdf]

|                                 |                |                   | Agonist Activity ( <i>EC</i> <sub>50</sub> ) or<br>Antagonist Activity ( <i>IC</i> <sub>50</sub> ), nM |                     |
|---------------------------------|----------------|-------------------|--------------------------------------------------------------------------------------------------------|---------------------|
| GPCR Target Name                | Gene symbol    | Mode of Activity  | Compound-A                                                                                             | Compound-B          |
| A <sub>2A</sub> receptor        | ADORA2A        | Agonism           | > 100,000                                                                                              | > 100,000           |
| α <sub>1B</sub> -Adrenoreceptor | ADRA1B         | Antagonism        | > 25,000                                                                                               | > 25,000            |
| α <sub>2C</sub> -Adrenoreceptor | ADRA2C         | Agonism           | n/a                                                                                                    | > 100,000           |
| β <sub>2</sub> -Adrenoreceptor  | ADRB2          | Agonism           | n/a                                                                                                    | > 100,000           |
| β <sub>2</sub> -Adrenoreceptor  | ADRB2          | Antagonism        | n/a                                                                                                    | > 100,000           |
| CB <sub>1</sub> receptor        | CNR1           | Agonism           | > 25,000                                                                                               | > 25,000            |
| D <sub>1</sub> receptor         | DRD1           | Antagonism        | > 100,000                                                                                              | > 100,000           |
| D <sub>2</sub> receptor         | DRD2           | Agonism           | n/a                                                                                                    | > 100,000           |
| D <sub>2</sub> receptor         | DRD2           | Antagonism        | n/a                                                                                                    | > 100,000           |
| H <sub>1</sub> receptor         | HRH1           | Antagonism        | > 25,000                                                                                               | > 25,000            |
| H <sub>3</sub> receptor         | HRH3           | Antagonism        | n/a                                                                                                    | > 50,000            |
| M <sub>1</sub> receptor         | CHRM1          | Agonism           | > 50,000                                                                                               | > 50,000            |
| M <sub>1</sub> receptor         | CHRM1          | Antagonism        | > 50,000                                                                                               | > 50,000            |
| M <sub>2</sub> receptor         | CHRM2          | Agonism           | > 50,000                                                                                               | > 50,000            |
| M <sub>2</sub> receptor         | CHRM2          | Antagonism        | > 50,000                                                                                               | > 50,000            |
| MRGPRX1                         | MRGPRX1        | Agonism           | > 100,000                                                                                              | > 100,000           |
| <b>MRGPRX1</b>                  | <b>MRGPRX1</b> | <b>Antagonism</b> | <b>&gt; 100,000</b>                                                                                    | <b>&gt; 100,000</b> |
| <b>NK<sub>1</sub> receptor</b>  | <b>TACR1</b>   | <b>Antagonism</b> | <b>&gt; 25,000</b>                                                                                     | <b>&gt; 25,000</b>  |
| κ-Receptor                      | OPRK1          | Agonism           | > 100,000                                                                                              | > 100,000           |
| μ-Receptor                      | OPRM1          | Agonism           | n/a                                                                                                    | > 100,000           |
| V <sub>1A</sub> receptor        | AVPR1A         | Antagonism        | > 50,000                                                                                               | > 50,000            |
| 5-HT <sub>1B</sub> receptor     | HTR1B          | Agonism           | 11,900                                                                                                 | > 50,000            |
| 5-HT <sub>2A</sub> receptor     | HTR2A          | Agonism           | > 100,000                                                                                              | > 100,000           |
| 5-HT <sub>2A</sub> receptor     | HTR2A          | Antagonism        | 41,400                                                                                                 | > 100,000           |
| 5-HT <sub>2B</sub> receptor     | HTR2B          | Agonism           | 27,100                                                                                                 | > 100,000           |
| 5-HT <sub>2C</sub> receptor     | HTR2C          | Agonism           | > 100,000                                                                                              | > 100,000           |
| 5-HT <sub>2C</sub> receptor     | HTR2C          | Antagonism        | > 100,000                                                                                              | > 50,000            |
| MRGPRX2                         | MRGPRX2        | Agonism           | > 30,000                                                                                               | > 30,000            |
| <b>MRGPRX2</b>                  | <b>MRGPRX2</b> | <b>Antagonism</b> | <b>50</b>                                                                                              | <b>2.9</b>          |

**Supplemental Table 2: Compound A and Compound B are highly selective MRGPRX2 antagonists, with little activity detected on other GPCRs.** Antagonist and/or agonist activities of the two compounds were determined in cellular assays for 20 human G-protein coupled receptors (GPCR) beside MRGPRX2. Recombinant over-expression systems in mammalian cells were used for all assays listed in this table. If the compound is inactive in the assay, EC<sub>50</sub> or IC<sub>50</sub> results were reported as ‘>’ the highest compound concentration allowed in that assay.
